# Supplementary material for: Nutritional deficiency induces nucleus pulposus cell apoptosis via the ATF4-PKM2-AKT signal axis
Source: Springer Nature journal article supplement (doi:10.1186/s12891-022-05853-1), 2022-11-02
Supplement: MOESM2 [file 23667430]

Figure 1B

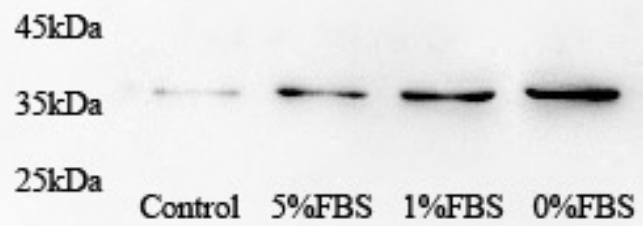

ATF4

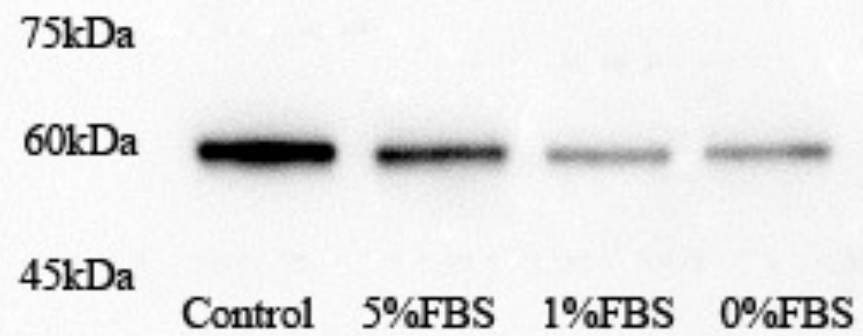

PKM2

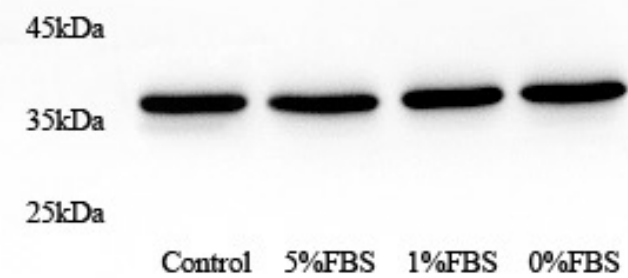

GAPDH

Figure 1D

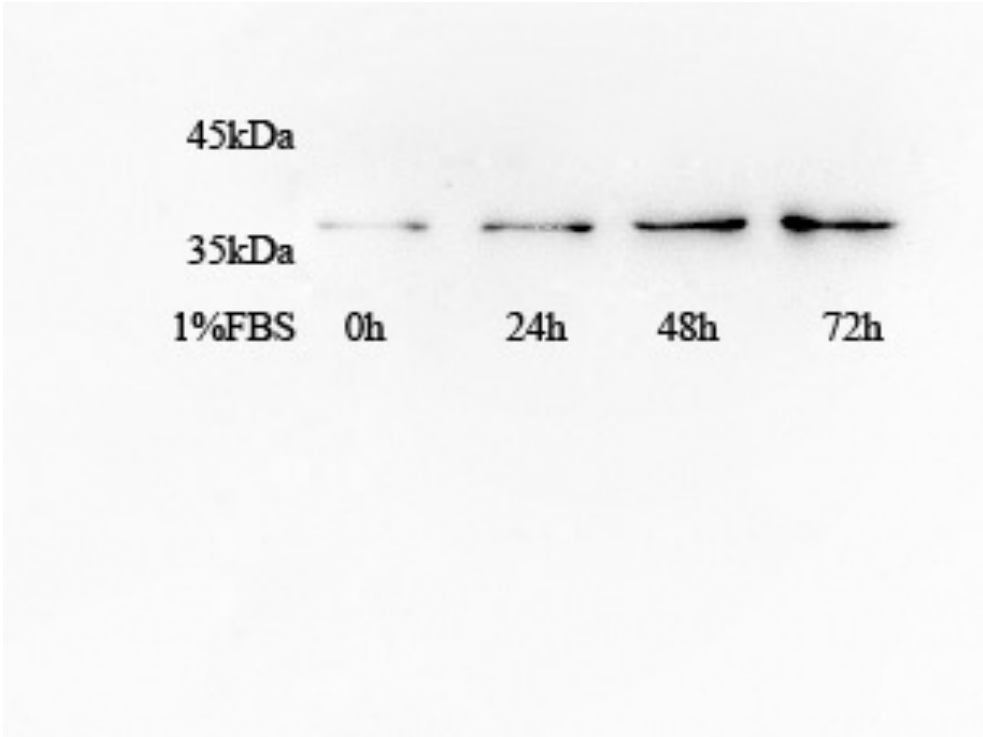

ATF4

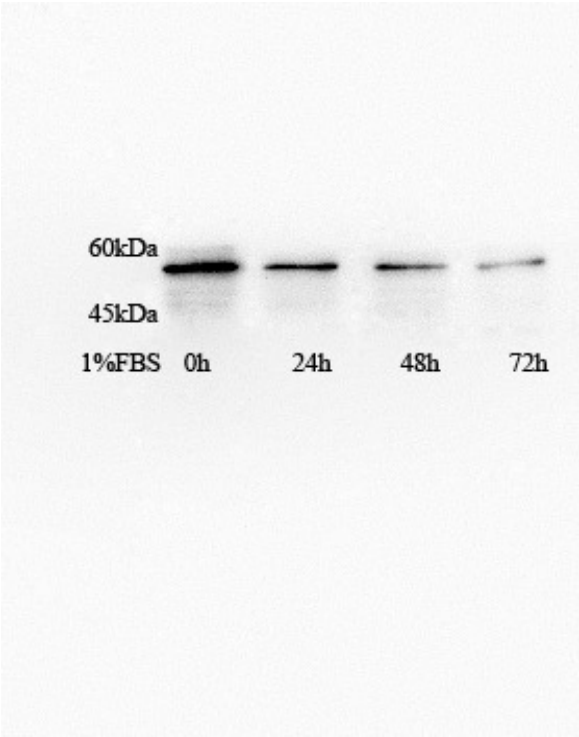

PKM2

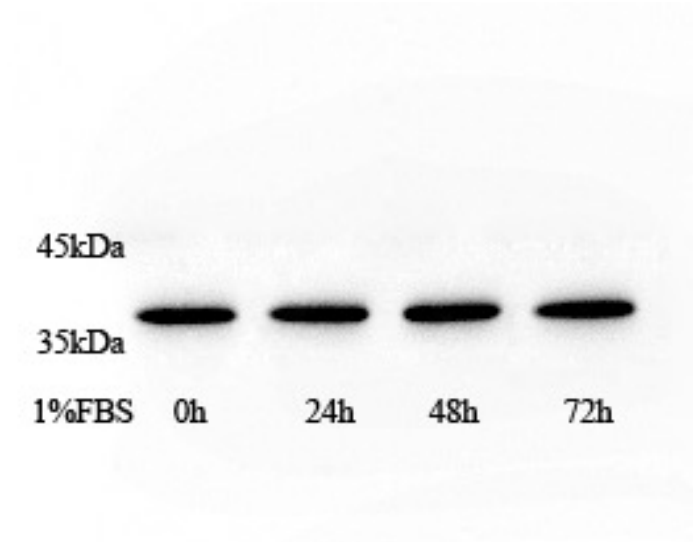

GAPDH

**Figure 2B**

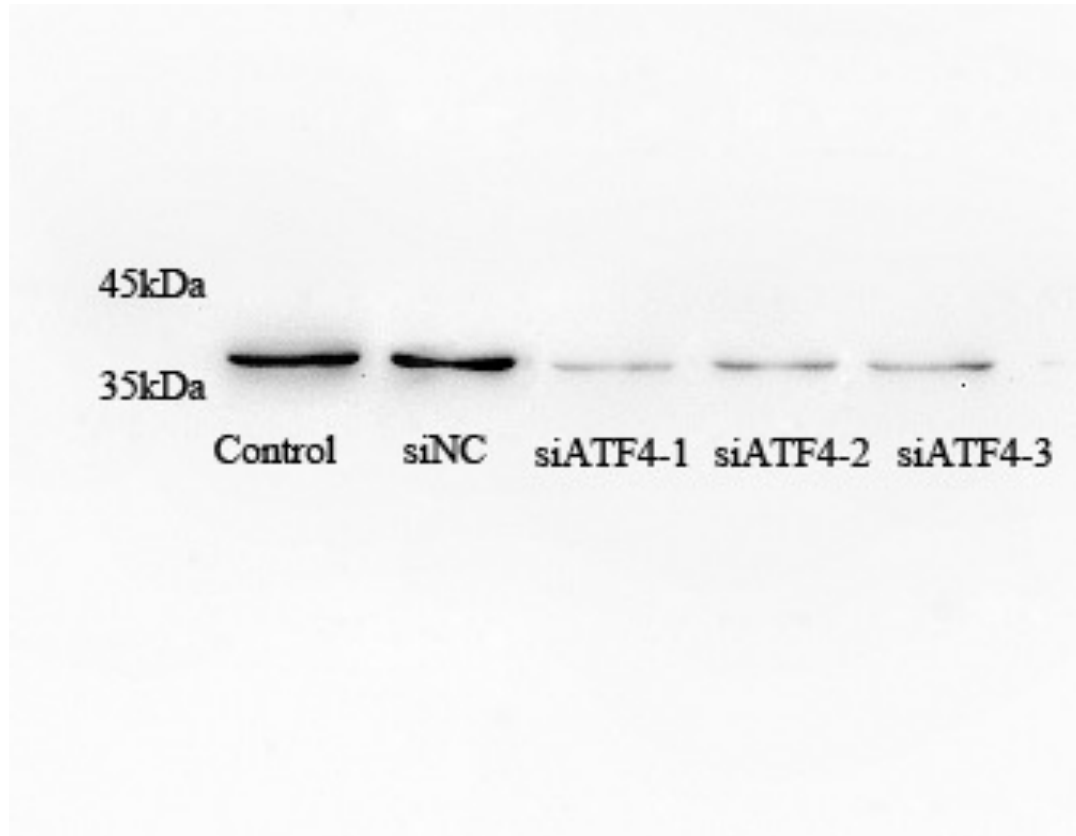

ATF4

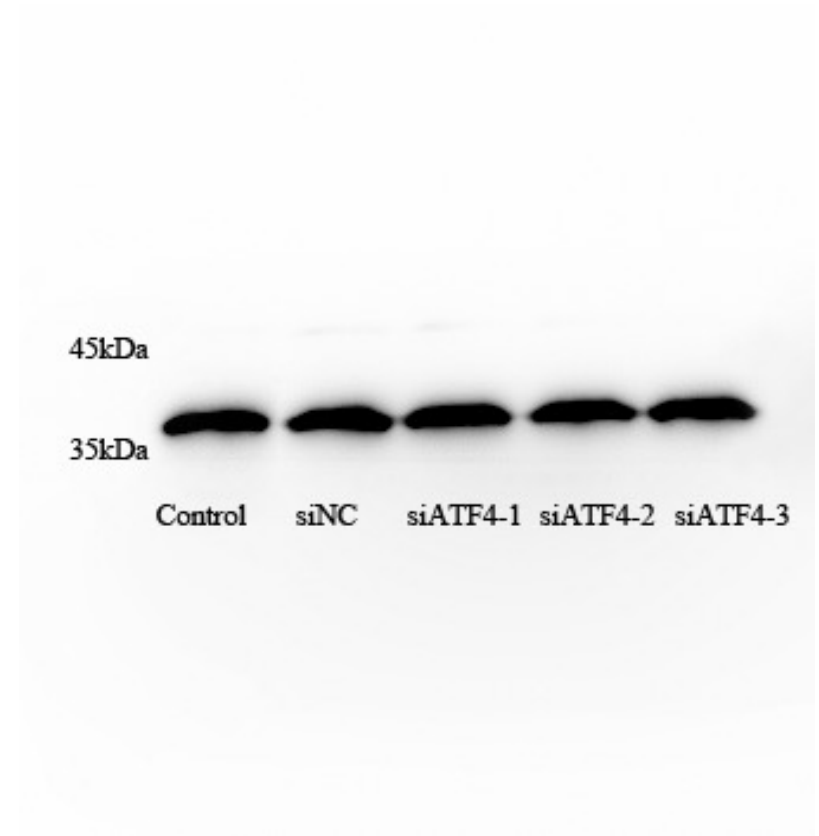

GAPDH

**Figure 2G**

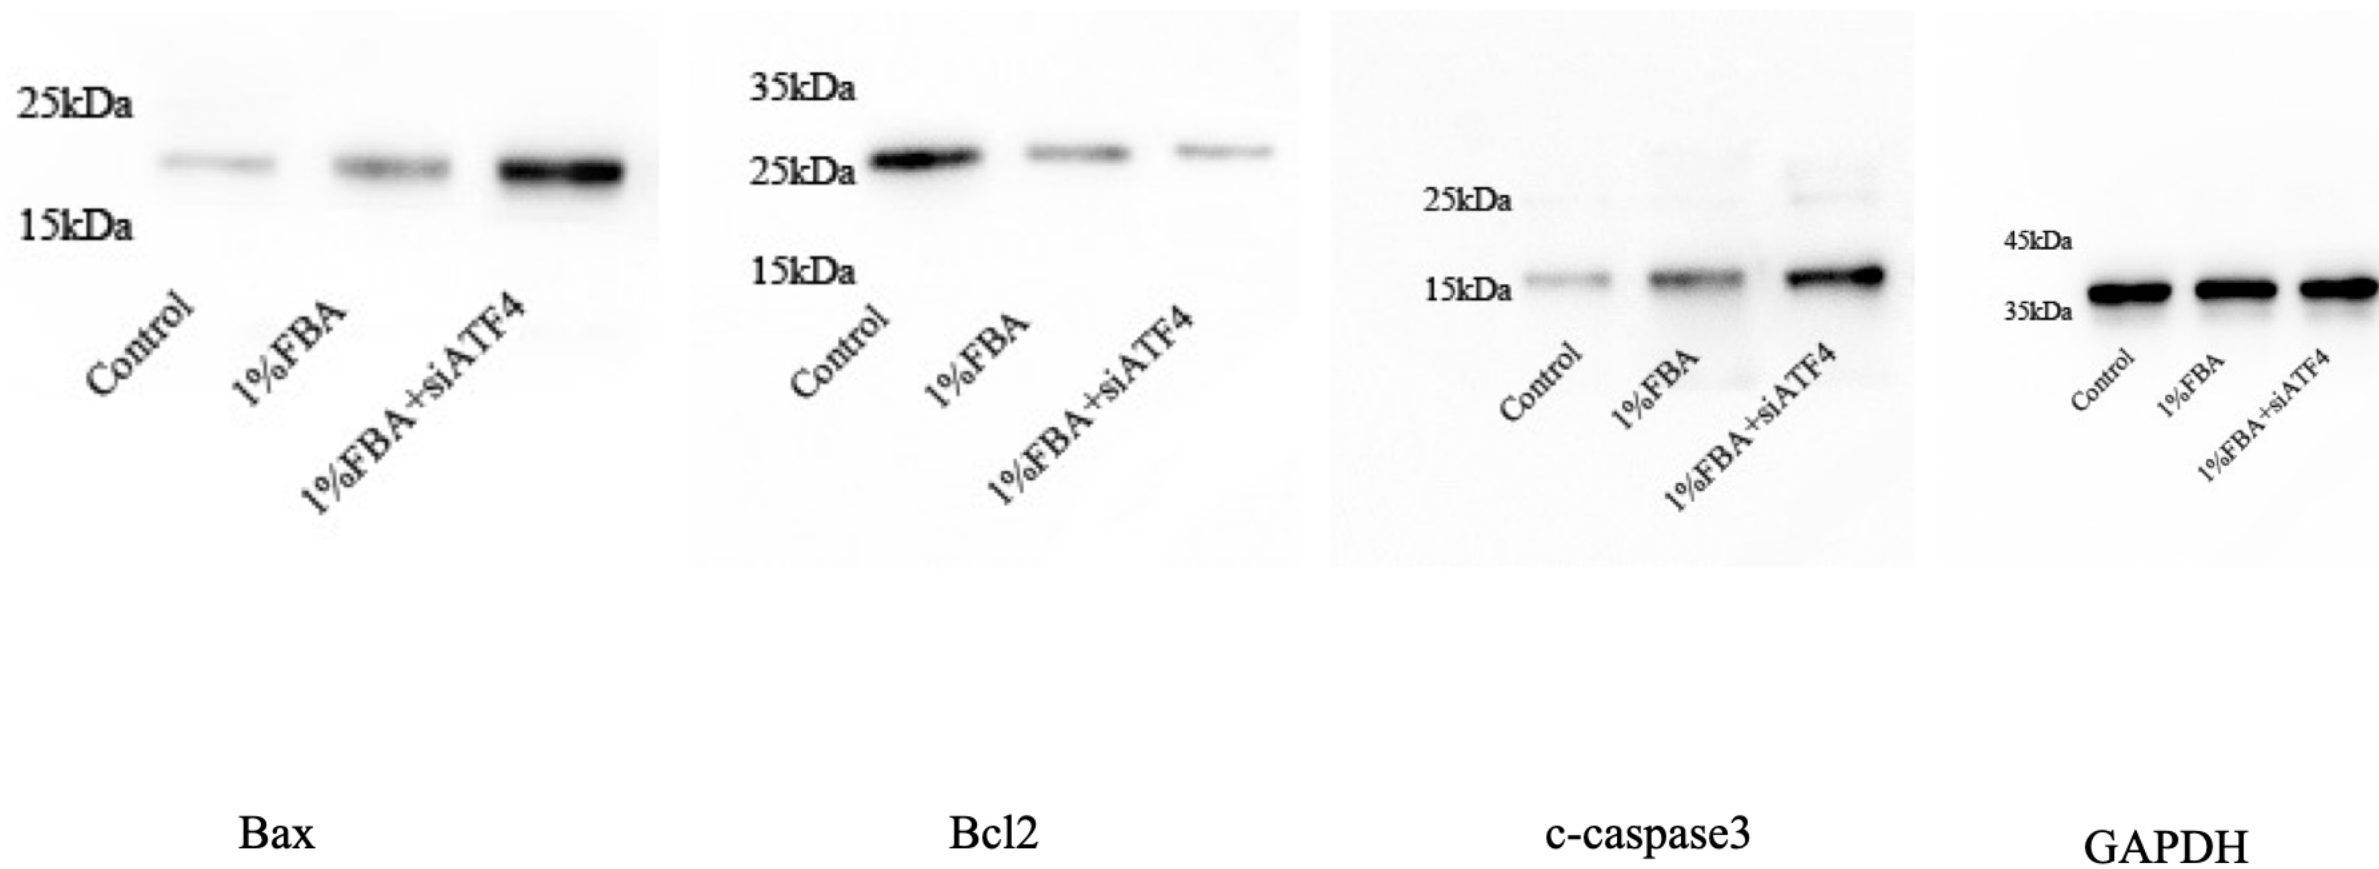

Figure 3C

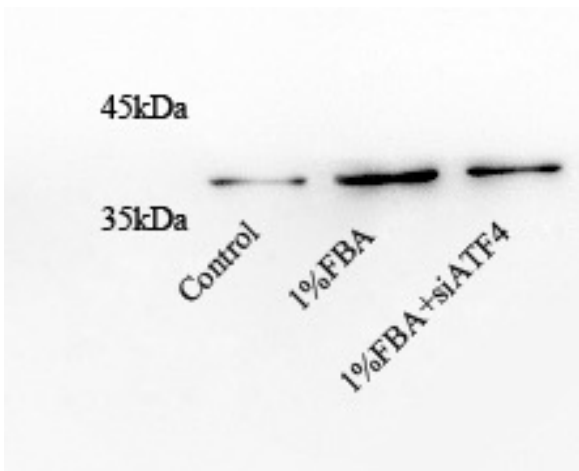

ATF4

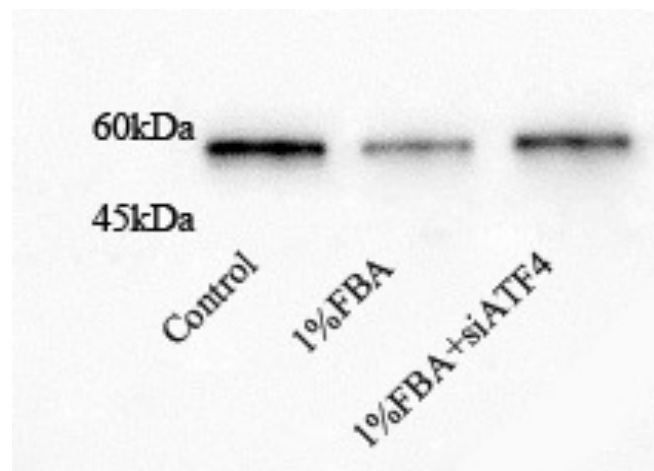

PKM2

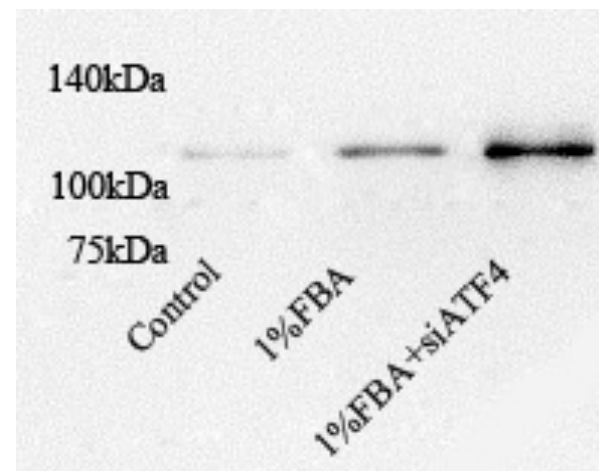

HIF

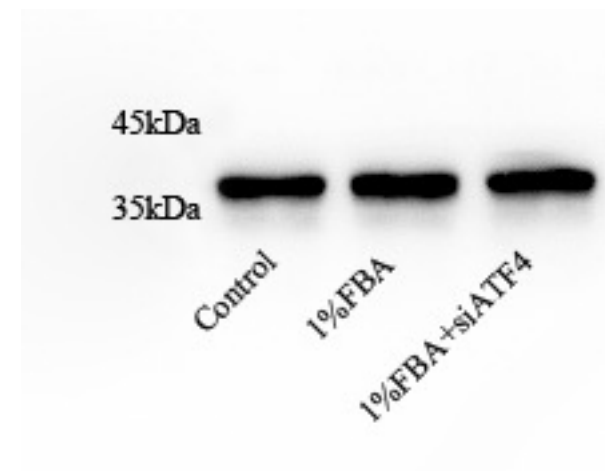

GAPDH

**Figure 4A**

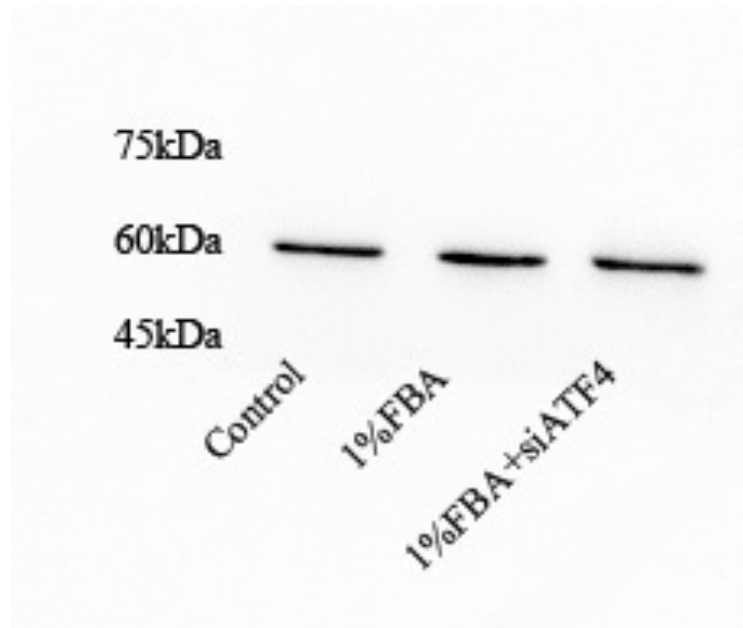

AKT

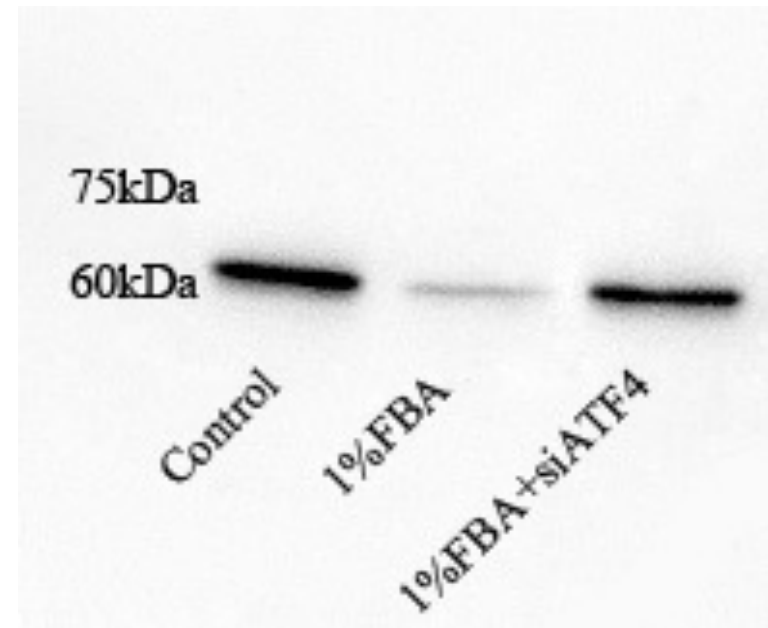

p-AKT

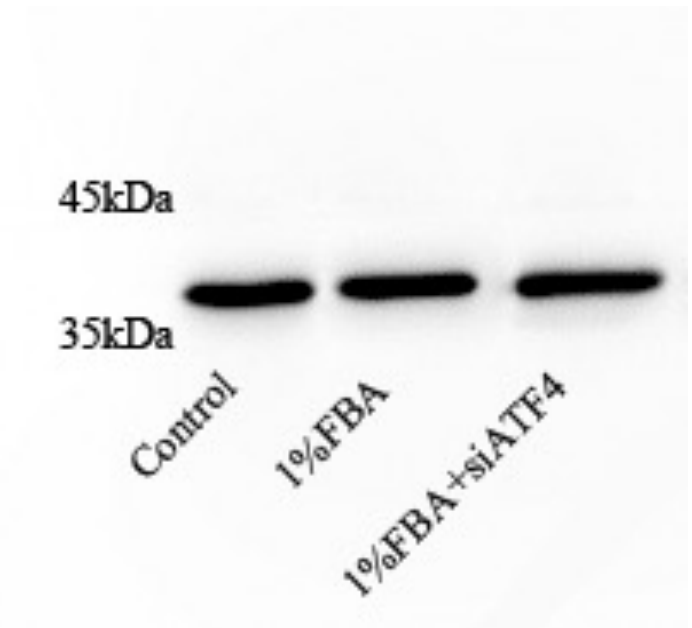

GAPDH

Figure 6C

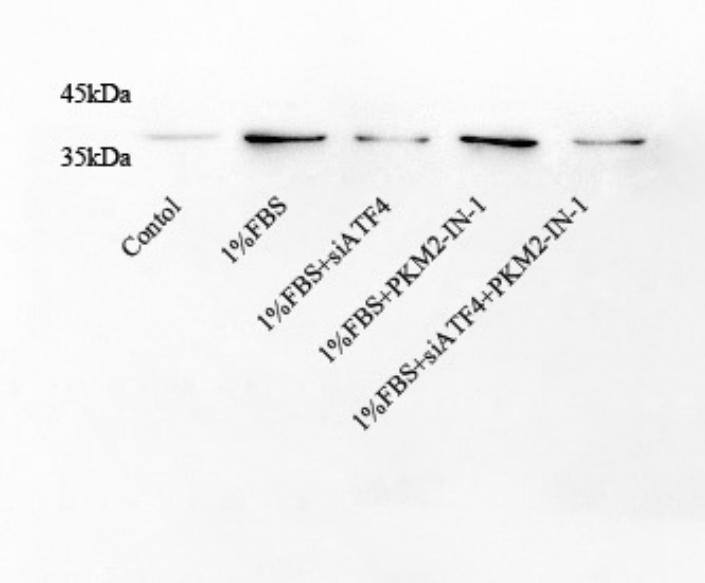

ATF4

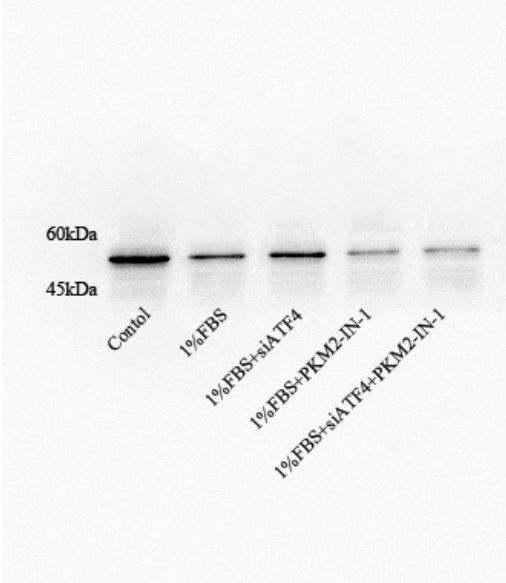

PKM2

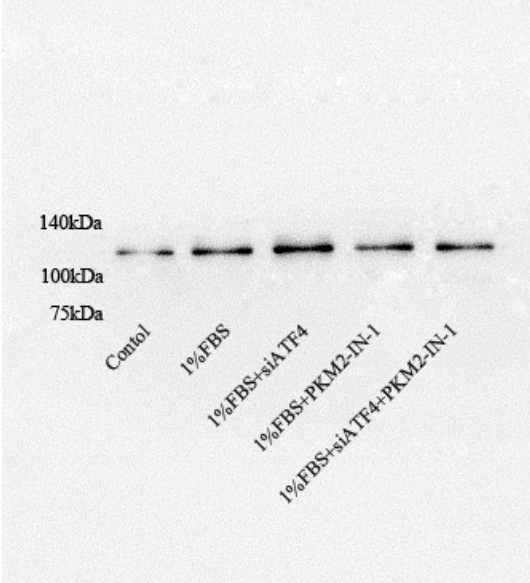

HIF

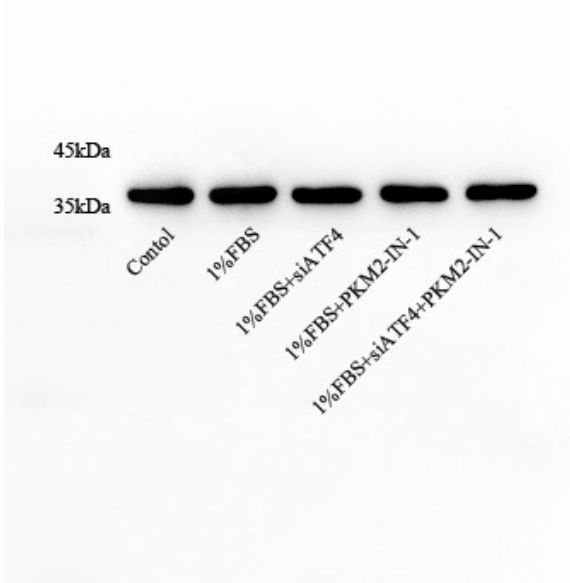

GAPDH

**Figure 7A**

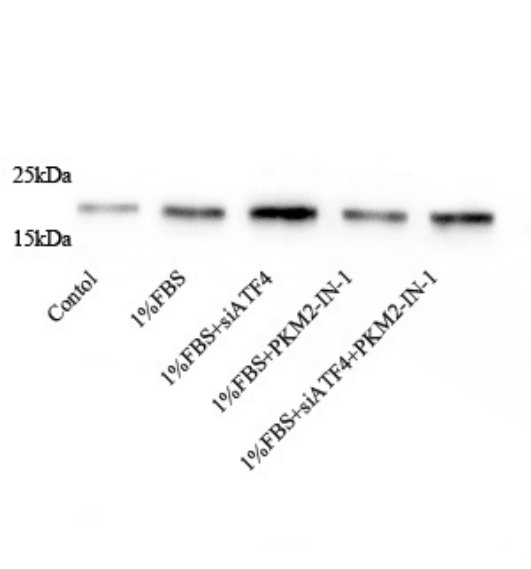

**Bax**

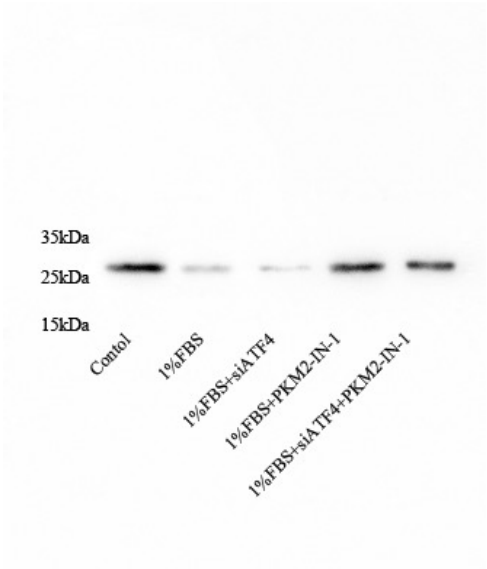

**Bcl2**

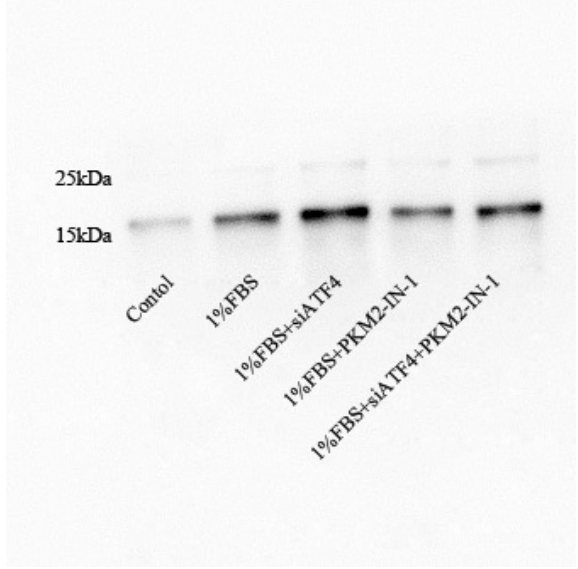

**c-caspase3**

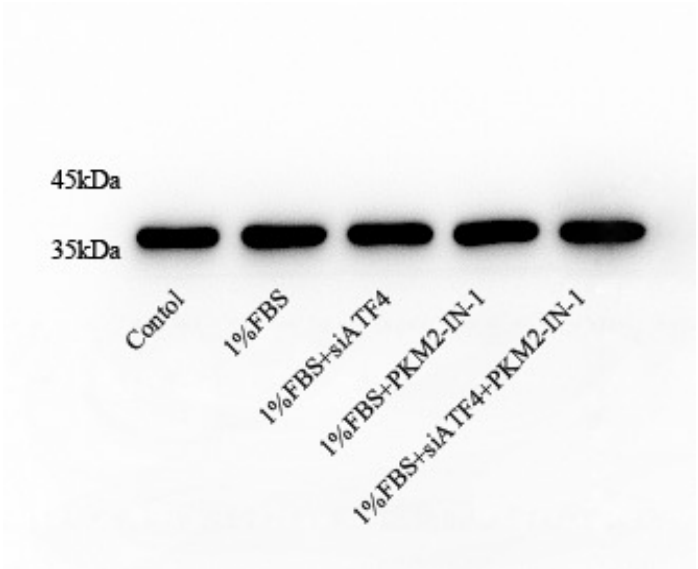

**GAPDH**



**Figure 7C**

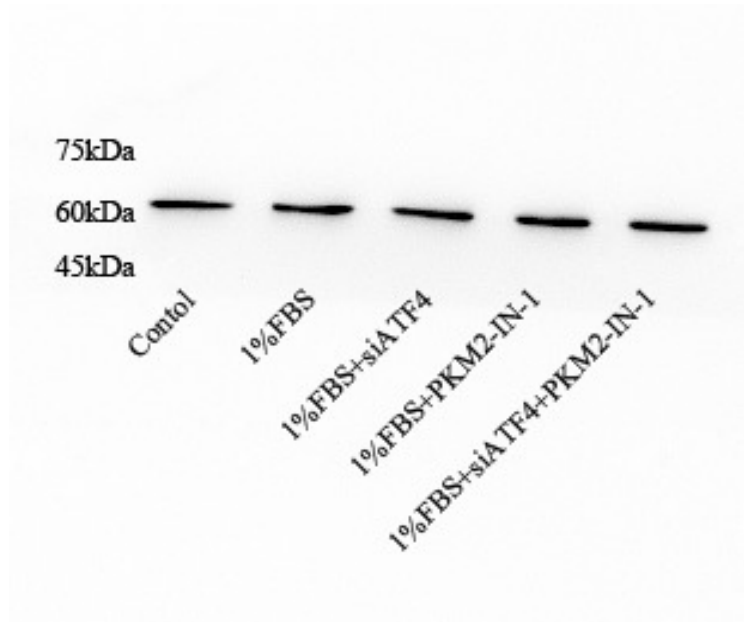

AKT

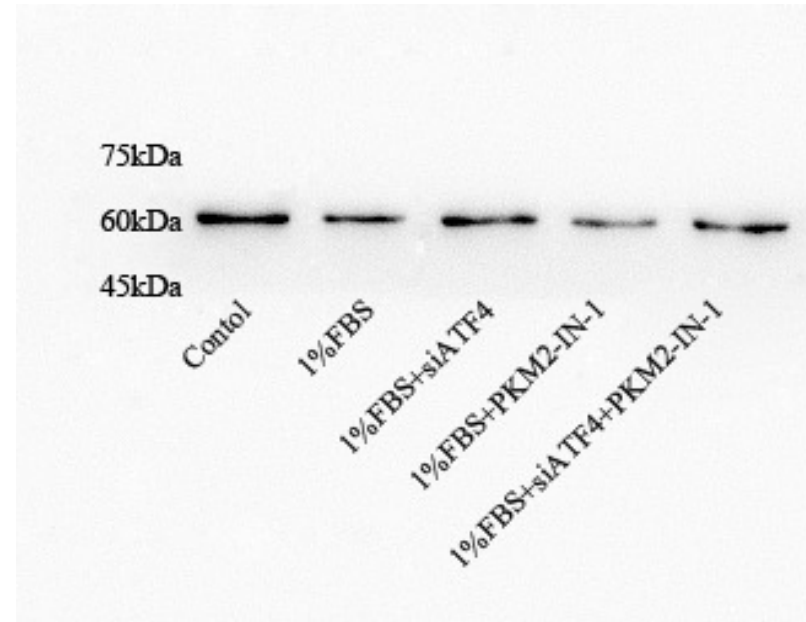

p-AKT

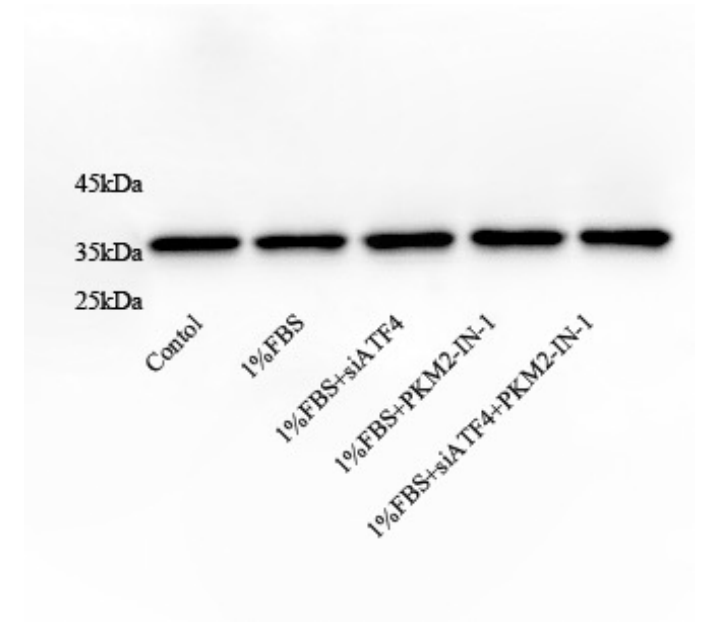

GAPDH
