# Supplementary material for: Nutritional deficiency induces nucleus pulposus cell apoptosis via the ATF4-PKM2-AKT signal axis
Source: Springer Nature journal article supplement (doi:10.1186/s12891-022-05853-1), 2022-11-02
Supplement: MOESM3 [file 23667430]

Figure 1B

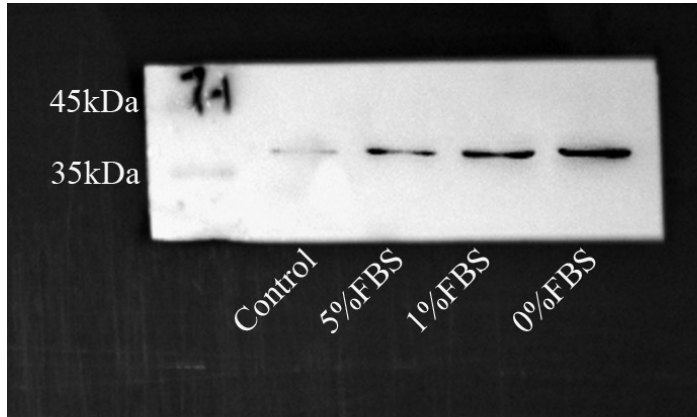

ATF4+39kDa

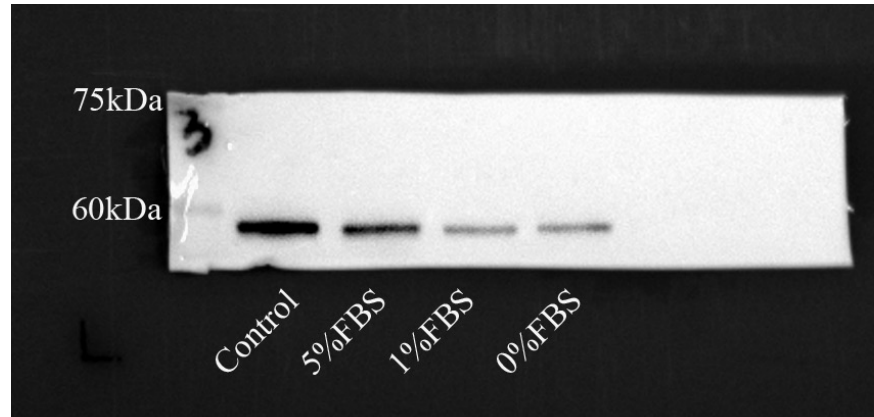

PKM2+58kDa

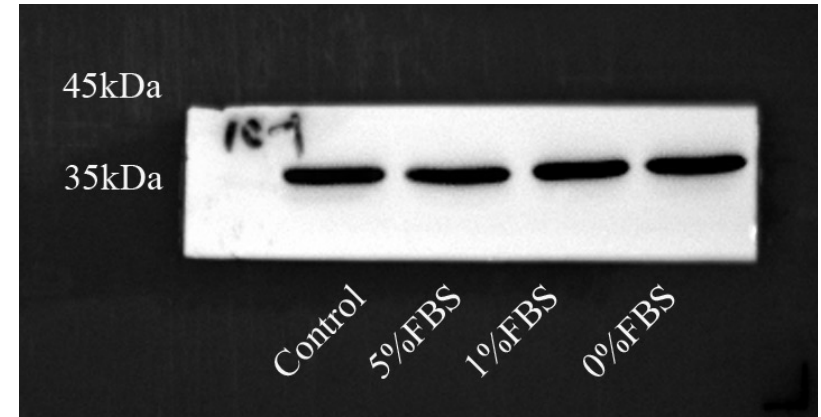

GAPDH+37kDa

Figure 1D

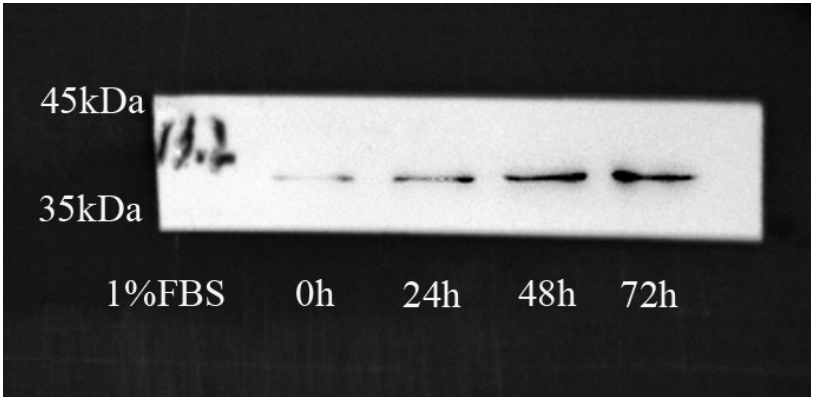

ATF4+39kDa

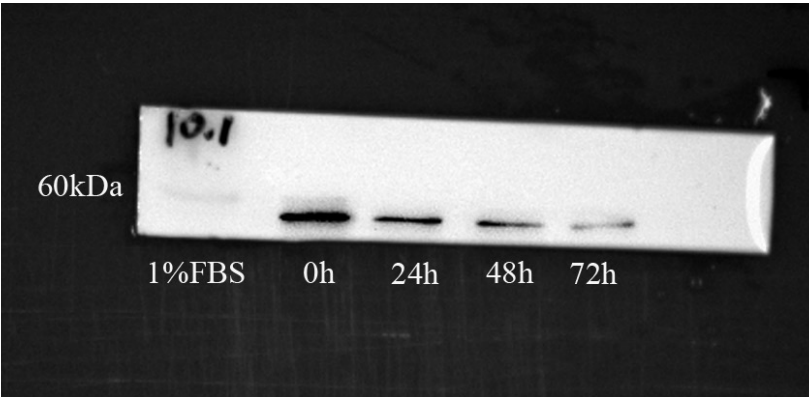

PKM2+58kDa

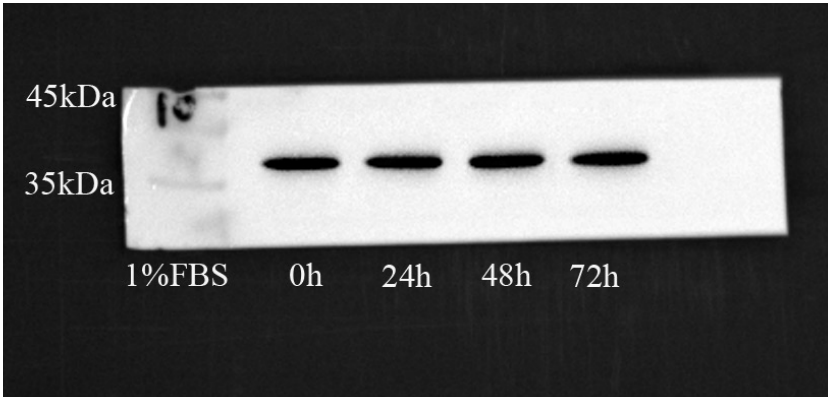

GAPDH+37kDa

Figure 2B

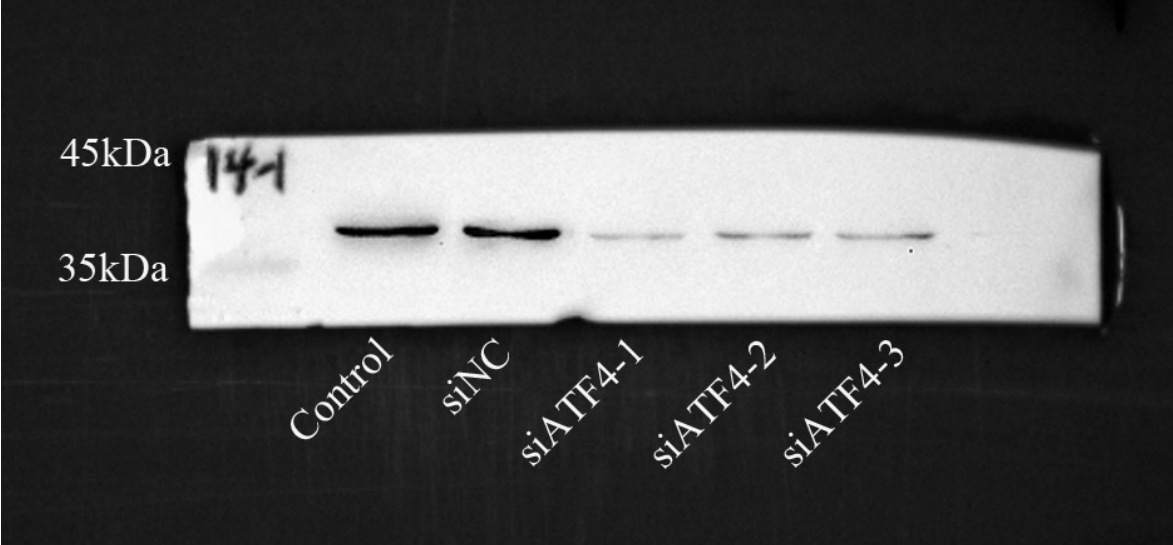

ATF4+39kDa

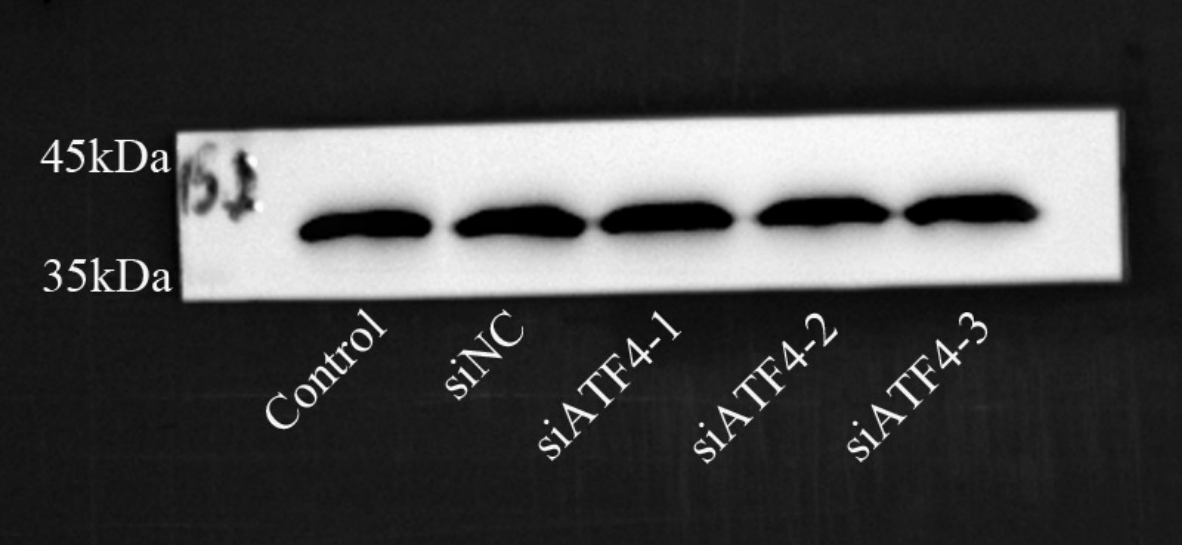

GAPDH+37kDa

**Figure 2G**

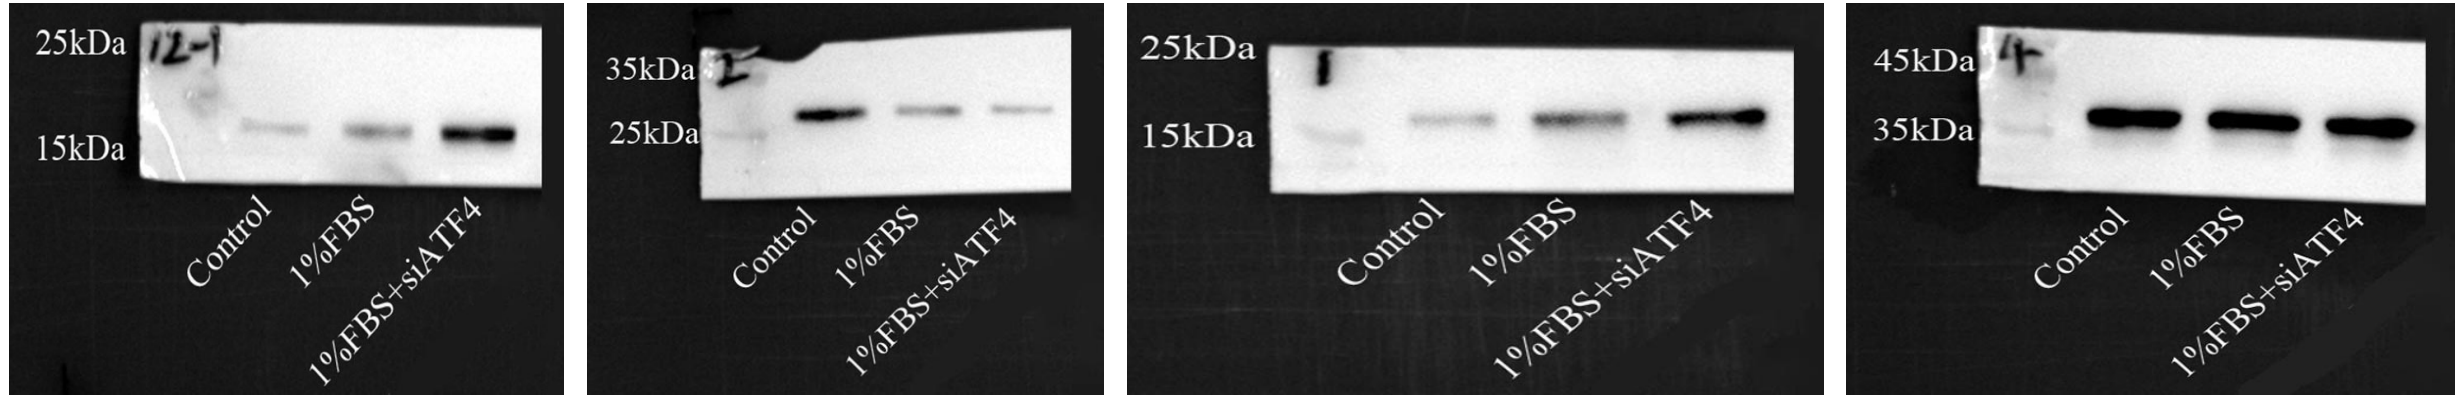

Bax+21kDa

Bcl2+26kDa

C-caspase-3+17kDa

GAPDH+37kDa

**Figure 3C**

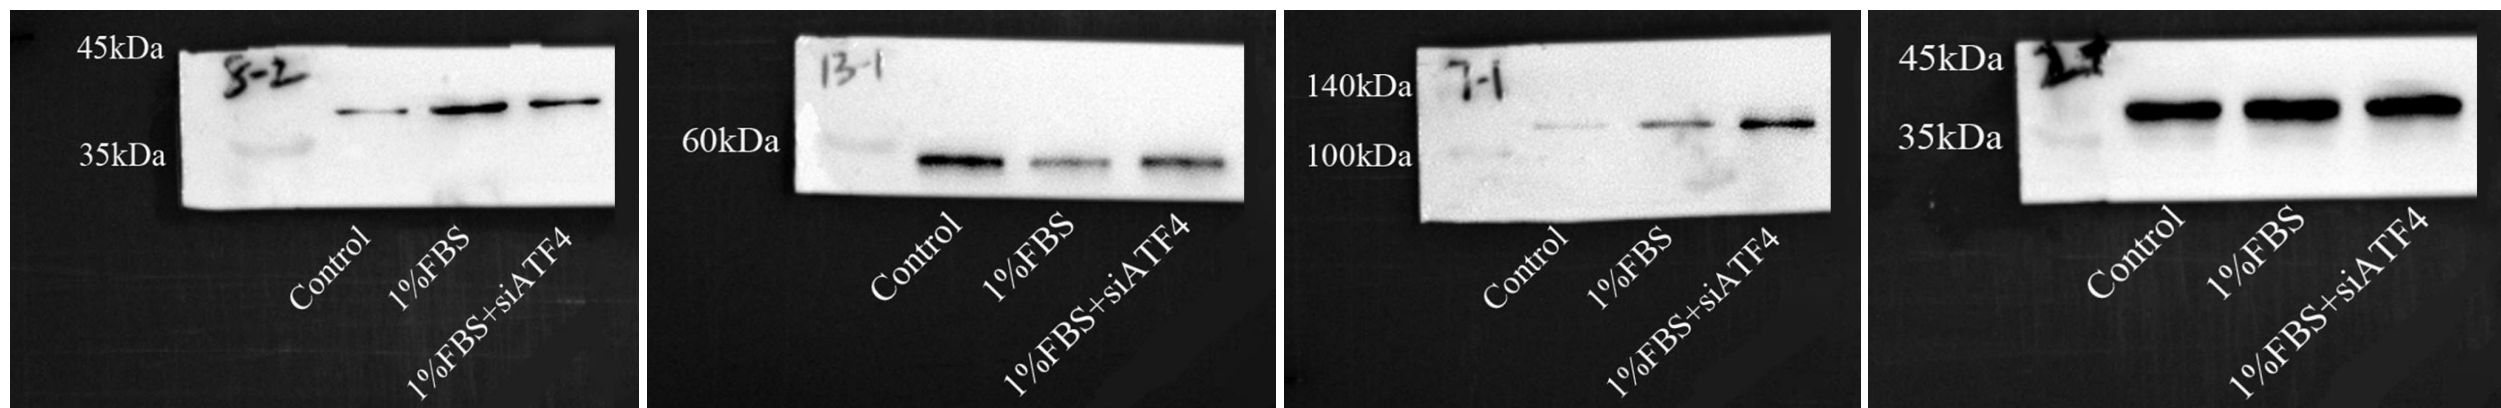

ATF4+39kDa

PKM2+58kDa

HIF-1a+120kDa

GAPDH2+37kDa

**Figure 4A**

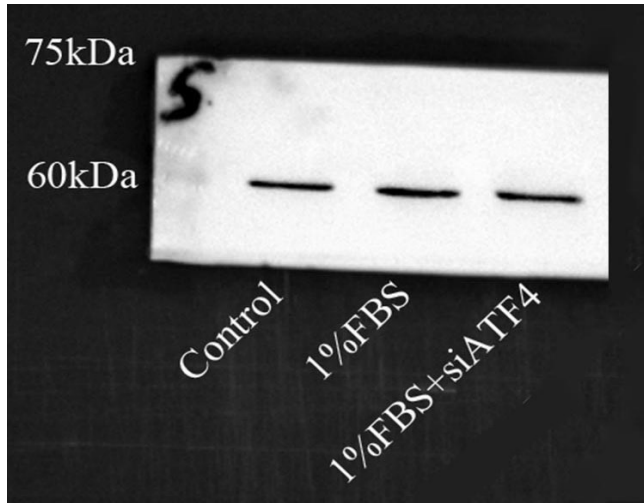

AKT+60kDa

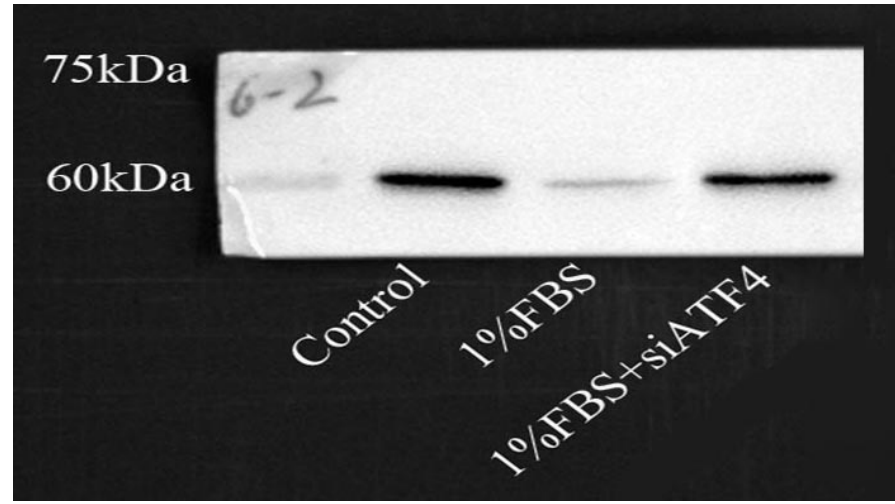

p-AKT+60kDa

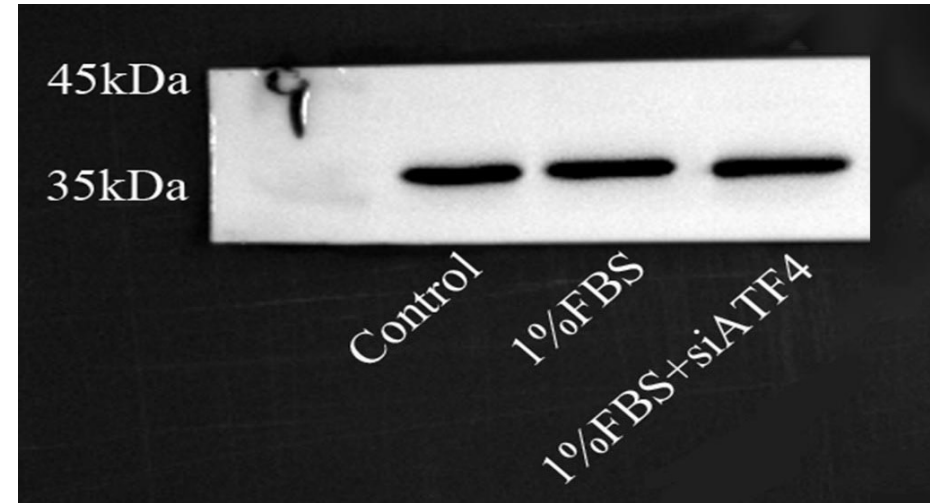

GAPDH+37kDa

Figure 6C

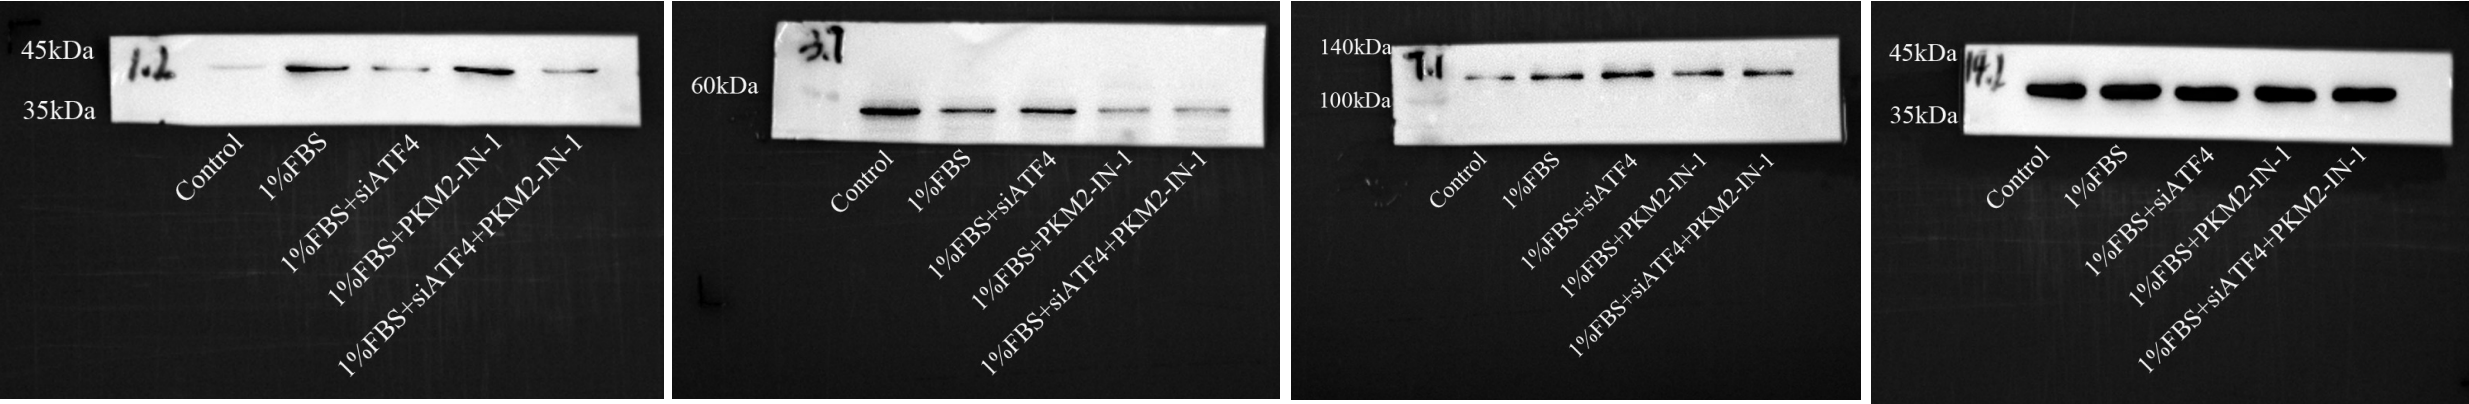

ATF4+39kDa

PKM2+58kDa

HIF-1a+120kDa

GAPDH+37kDa

**Figure 7A**

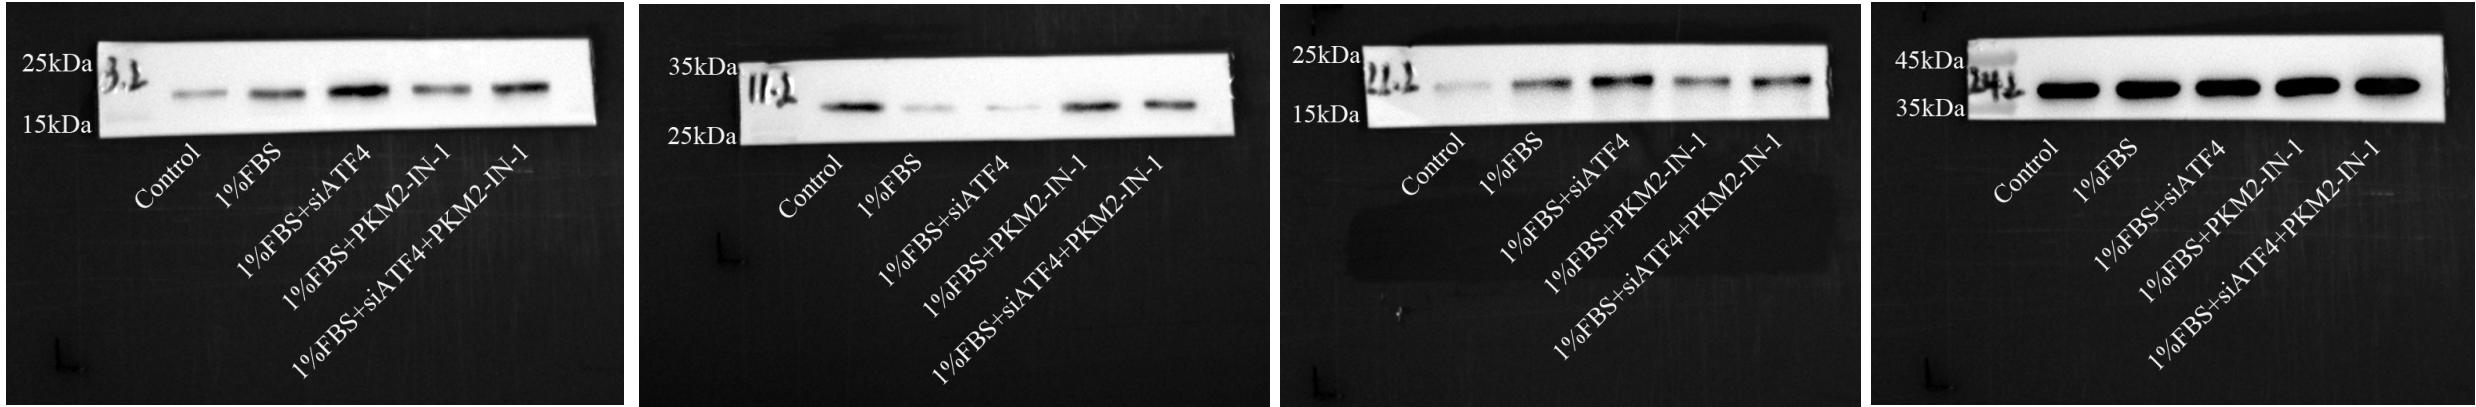

Bax+21kDa

Bcl2+26kDa

C-caspase3+17kDa

GAPDH+37kDa



**Figure 7C**

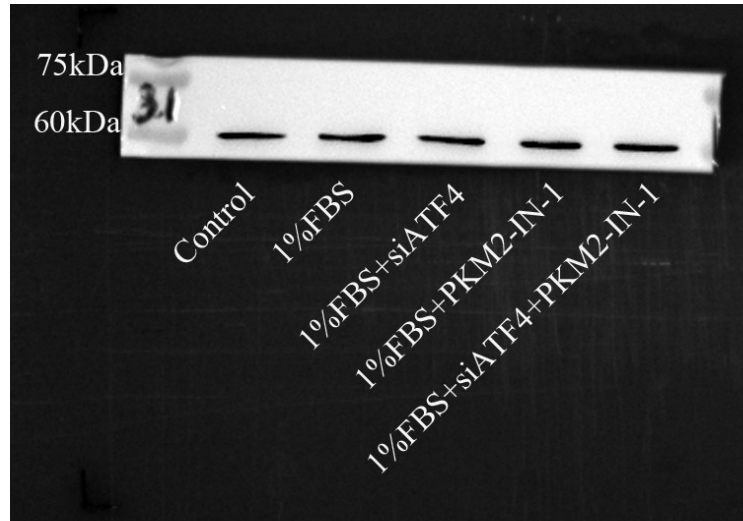

AKT+60kDa

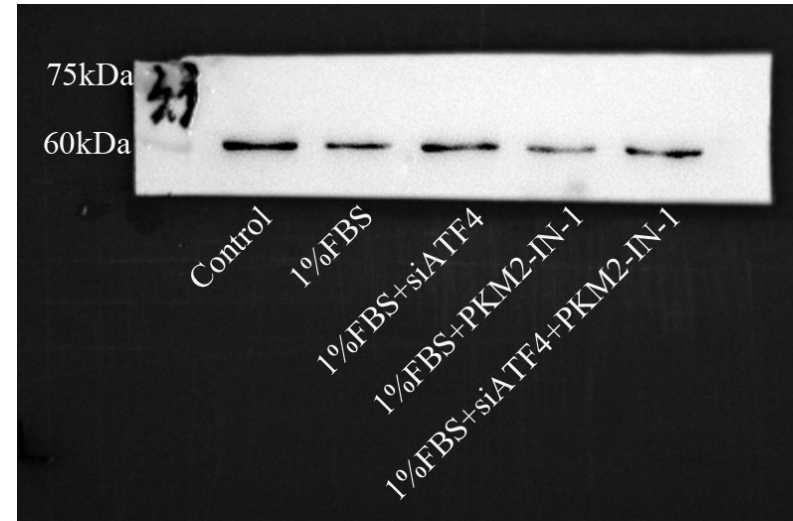

p-AKT+60kDa

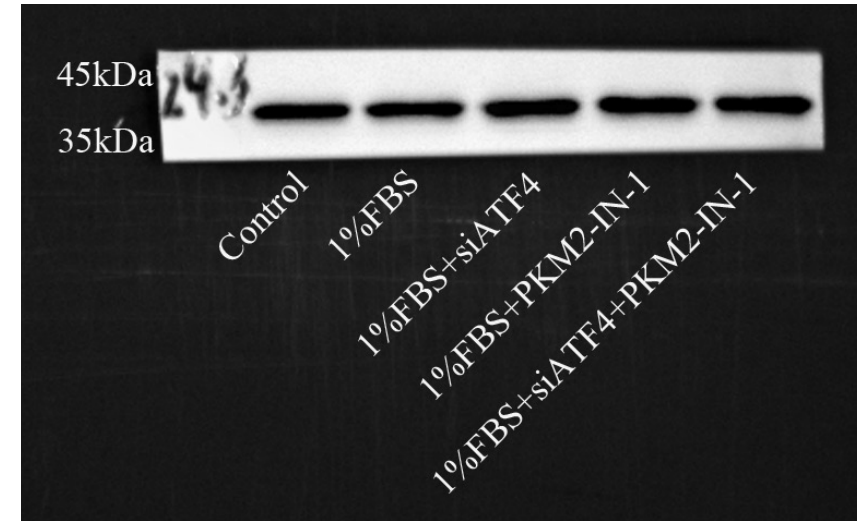

GAPDH+37kDa
